# Supplementary material
Source: PubMed Central journal article supplement (PMC3270153)
Supplement: NIHMS318452-supplement-supplement_1.pdf [file NIHMS318452-supplement-supplement_1.pdf]

## Online Supplement:

Modifiable aspects of the rapid sequence induction (RSI) procedure on the subset of respondents that perform modified RSI procedures and consistently completed Items 8-11. Estimates correspond to either probabilities and their 95% confidence intervals or the odds ratio comparing attendings to residents (reference group).

|                                                                     | All: p (95% CI)<br>N=430 | Status: p (95% CI) |                    | Status Comparison |         |
|---------------------------------------------------------------------|--------------------------|--------------------|--------------------|-------------------|---------|
|                                                                     |                          | Resident<br>N=194  | Attending<br>N=236 | OR (95% CI)       | P-value |
| <b>Oxygenate before induction</b>                                   | 1.00 (---)               | 1.00 (---)         | 1.00 (---)         | ---               | ---     |
| <b>Apply cricoid pressure</b>                                       | 0.90 (0.85, 0.94)        | 0.92 (0.86, 0.95)  | 0.89 (0.83, 0.93)  | 0.73 (0.37, 1.41) | 0.344   |
| <b>Ventilate patient with a facemask</b>                            | 0.78 (0.72, 0.83)        | 0.73 (0.64, 0.80)  | 0.82 (0.76, 0.87)  | 1.69 (1.11, 2.57) | 0.015   |
| <b>Apply cricoid pressure and ventilate patient with a facemask</b> | 0.71 (0.64, 0.77)        | 0.66 (0.58, 0.74)  | 0.75 (0.67, 0.82)  | 1.51 (1.01, 2.26) | 0.045   |
